# Supplementary material for: The thermodynamics and electronic structure analysis of P-doped spinel Co3O4
Source: Royal Society of Chemistry journal article supplement (doi:10.1039/d0cp05284a), 2021-01-01
Supplement: d0cp05284a1.pdf [file d0cp05284a1.pdf]

## Supporting Information for

### The thermodynamics and electronic structures of P-doped spinel $\text{Co}_3\text{O}_4$

Lixin Xiong<sup>1</sup>, Dixing Ni<sup>1</sup>, Wan Xiong<sup>1</sup>, Hewen Wang<sup>2</sup>, Chuying Ouyang<sup>1\*</sup>

<sup>1</sup>Department of Physics, Laboratory of Computational Materials Physics, Jiangxi Normal University, Nanchang, 330022, China

<sup>2</sup> College of Chemistry and Chemical Engineering, Hubei Key Laboratory for Processing and Application of Catalytic Materials, Huanggang Normal University, Huanggang 438000, China

\*Corresponding author's E-mail: [cyouyang@jxnu.edu.cn](mailto:cyouyang@jxnu.edu.cn)

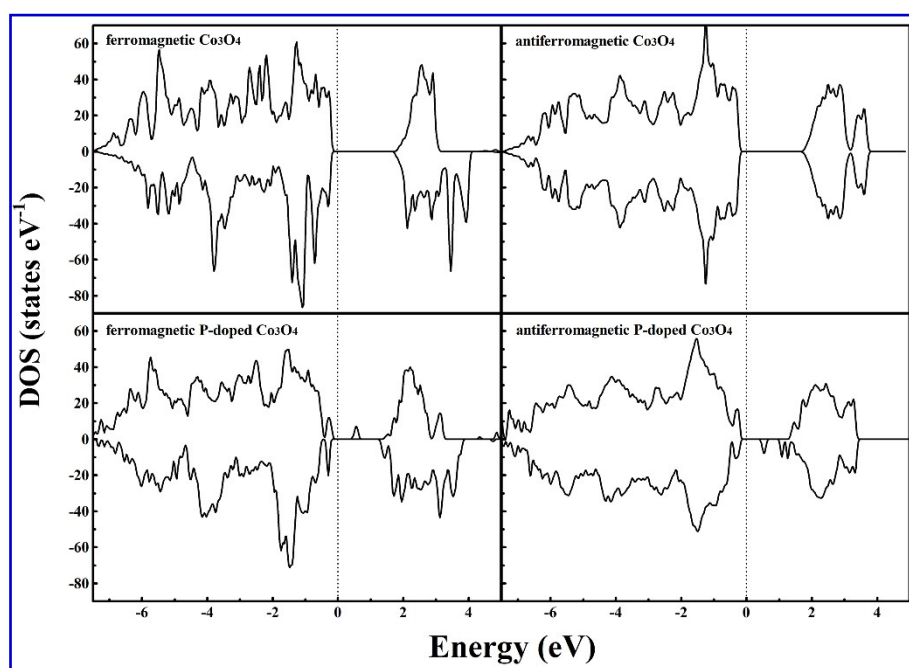

Fig. S1. The DOS of intrinsic and P-doped (O)  $\text{Co}_3\text{O}_4$  with different magnetic configuration. The Fermi level ( $E_f$ ) is set to be 0 eV.

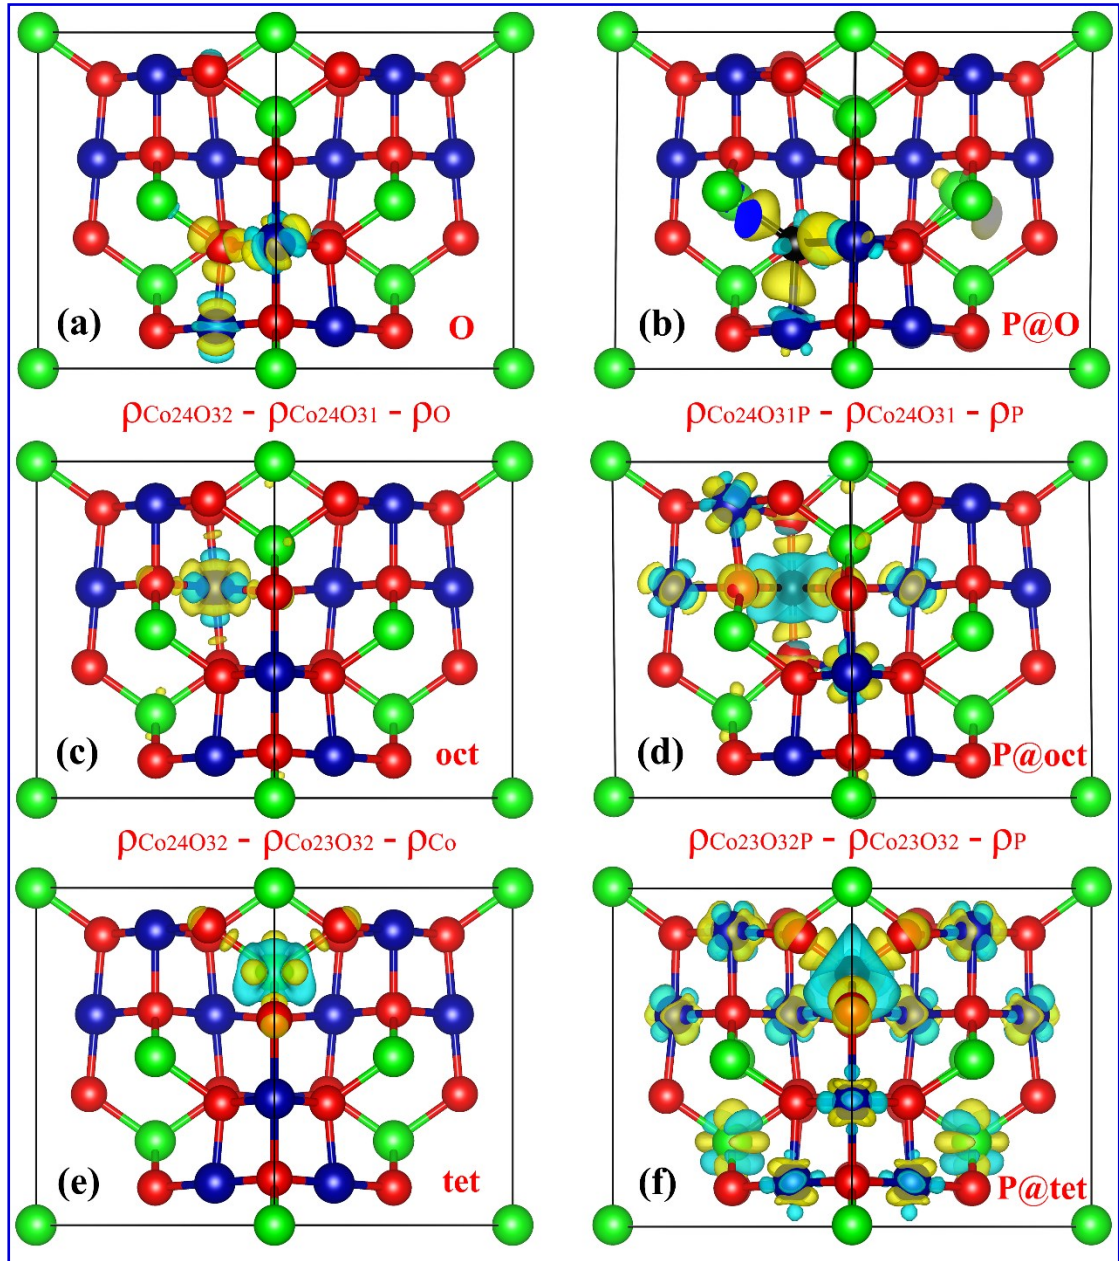

Fig. S2. The calculated charge density difference of intrinsic (a, c, e) and P-doped (b, d, f)  $\text{Co}_3\text{O}_4$ , the yellow and sky-blue represent negative charge and positive charge accumulation, respectively. The isosurface values are set to be 0.015 and 0.01 electron/ $\text{\AA}^3$  for intrinsic and P-doped  $\text{Co}_3\text{O}_4$ .

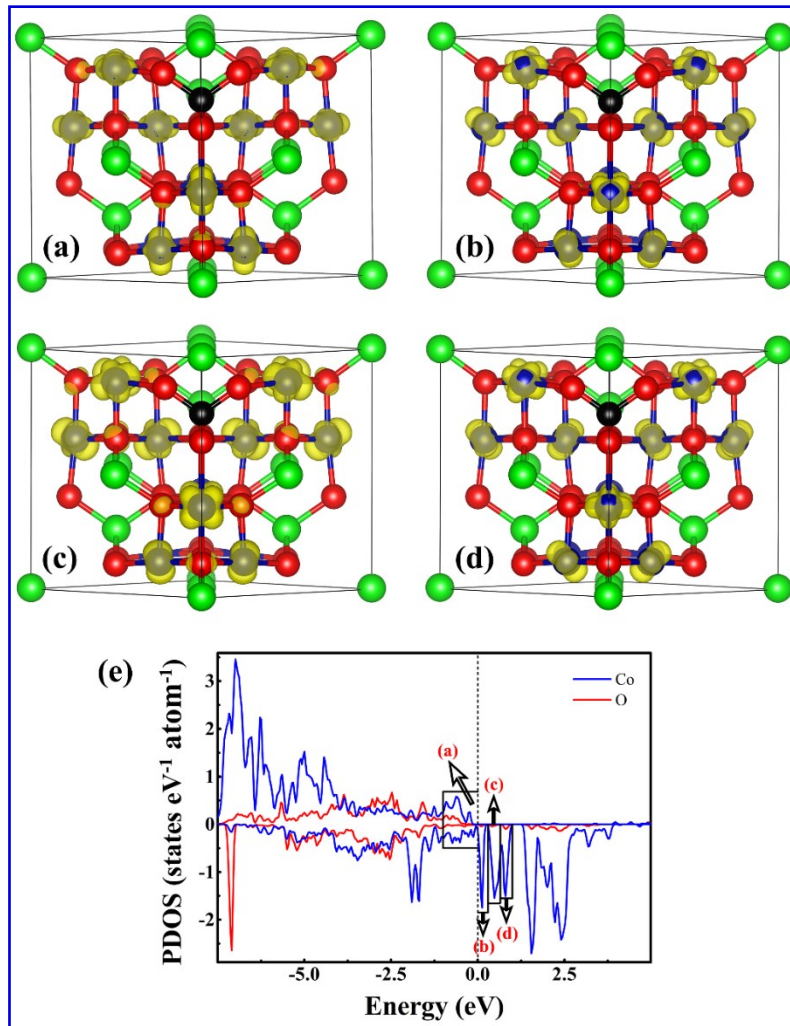

**Fig. S3.** (a), (b), (c) and (d) are the decomposed charge density of P doping at  $\text{Co}_{\text{tet}}$  in the energy range of  $(E_f - 1.0 \text{ eV}, E_f)$ ,  $(E_f, E_f + 0.3 \text{ eV})$ ,  $(E_f + 0.3 \text{ eV}, E_f + 0.7 \text{ eV})$  and  $(E_f + 0.7 \text{ eV}, E_f + 1.0 \text{ eV})$ , respectively. (e) presents the atomic PDOS of the  $\text{Co}_{\text{oct}}$  and O atoms closest to the doped P atom. The blue, green, red and black spheres denote the octahedral Co, tetrahedral Co, O and P atoms, respectively. The charge density contours are in transparent yellow and the isosurface values are set to be  $0.009 \text{ electron}/\text{\AA}^3$ .

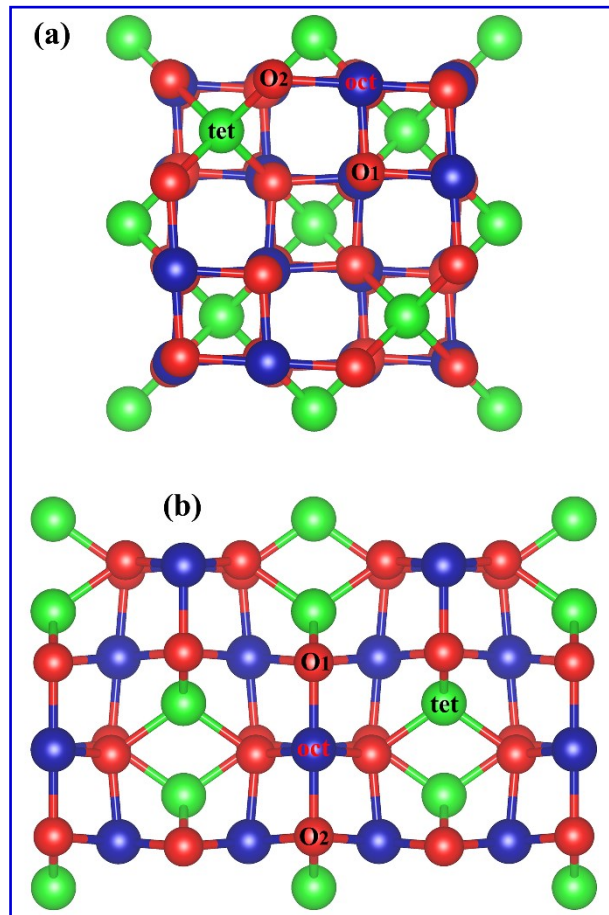

Fig. S4. (a) and (b) are top views of the atomic structures of the (100)-B and (110)-B slab models, respectively.

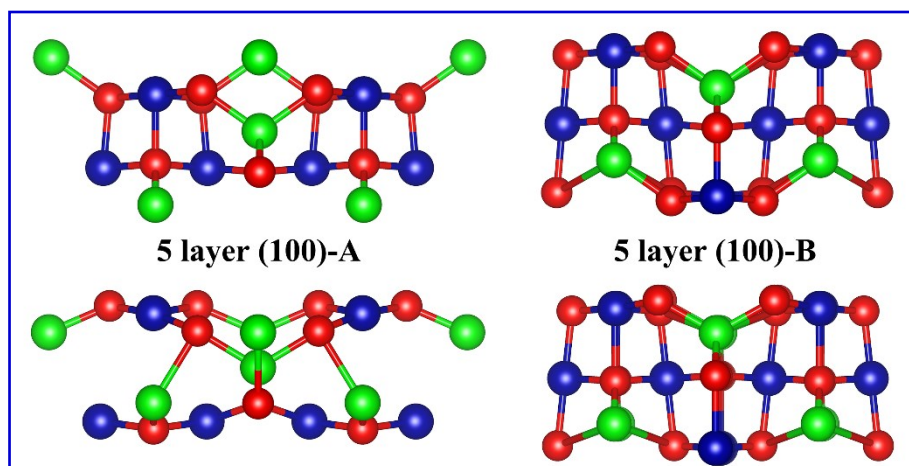

Fig. S5. The side view of the atomic structure of the 5-layer surface models before (up) and after (down) optimization.

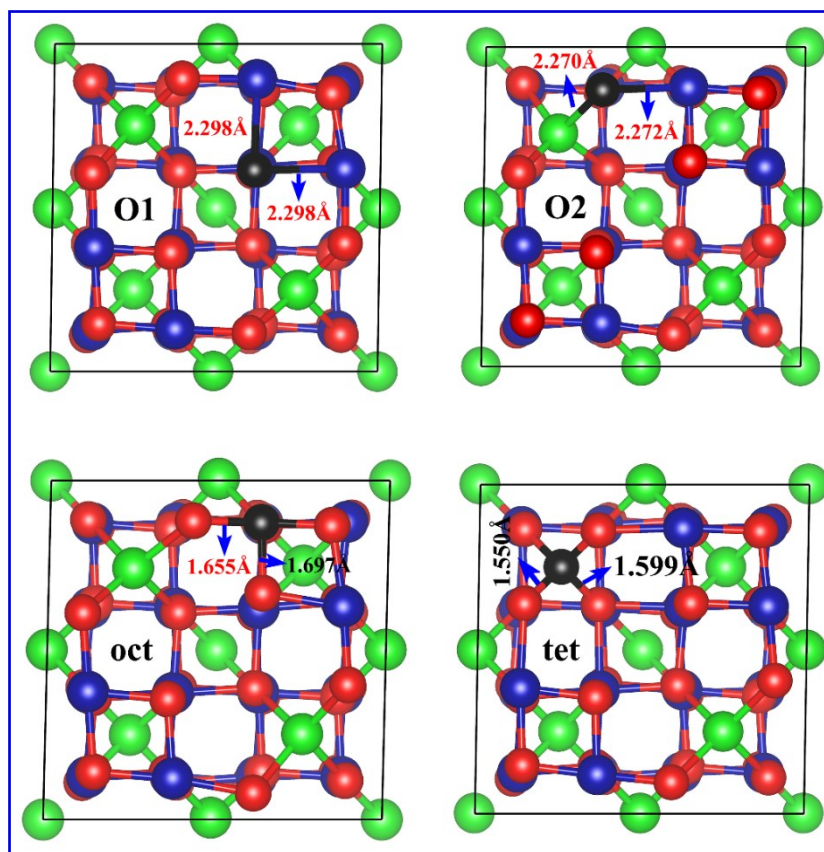

Fig. S6. The top views of the atomic structures of the 9-layer (100)-B slab model after P doping at different sites.

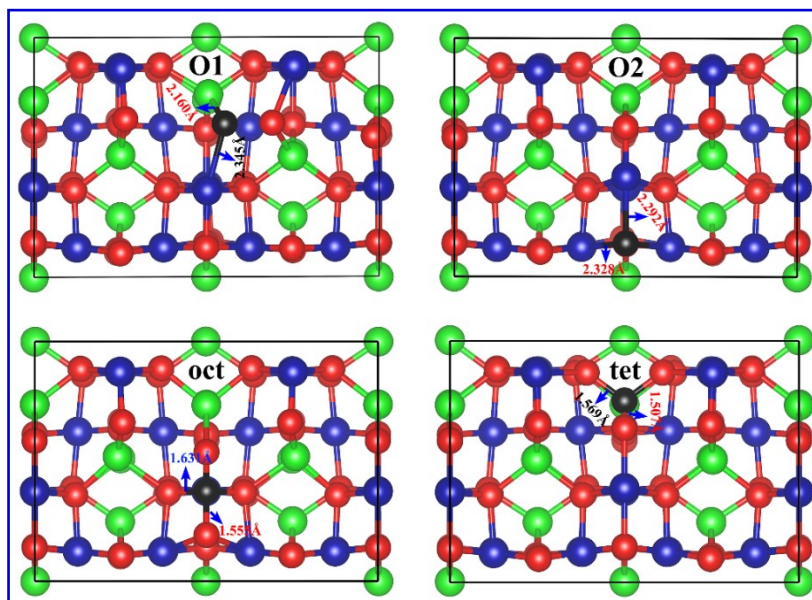

Fig. S7. The top views of the atomic structures of the 7-layer (110)-B slab model after P doping at different sites.

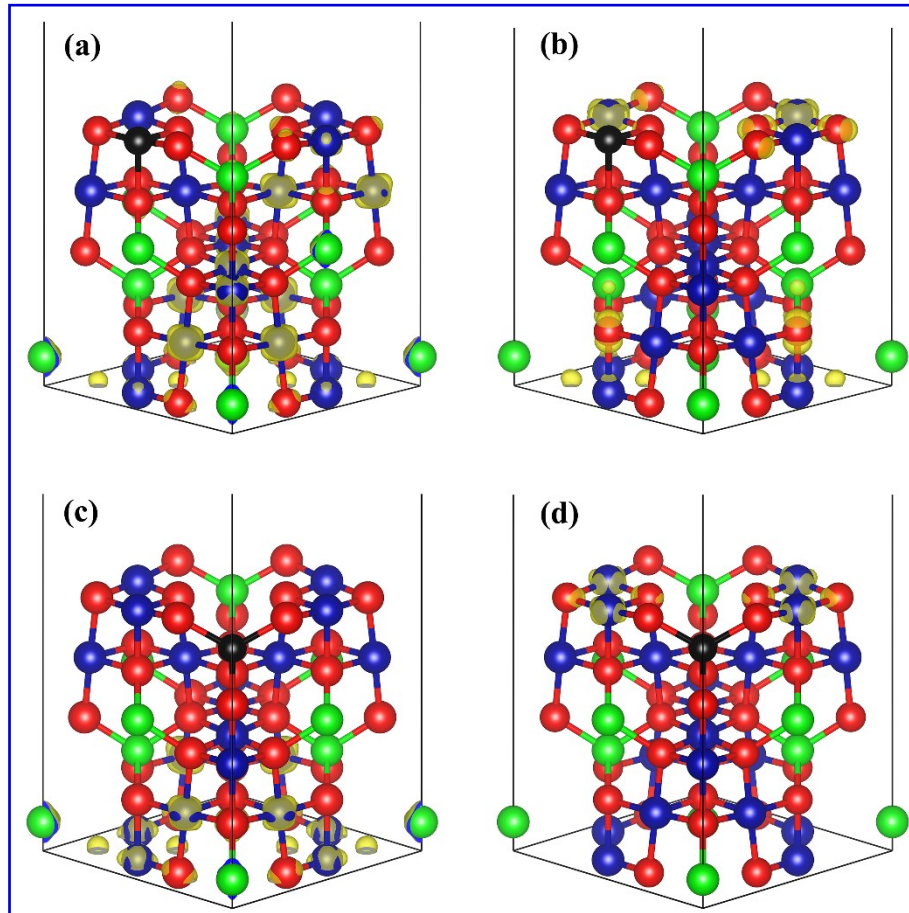

**Fig. S8.** (a) and (b) are the decomposed charge density of P doping at 100-B  $\text{Co}_{\text{oct}}$  in the energy range of  $(E_f - 1.0 \text{ eV}, E_f)$  and  $(E_f, E_f + 1.0 \text{ eV})$ . (c) and (d) are the decomposed charge density of P doping at 100-B  $\text{Co}_{\text{tet}}$  in the energy range of  $(E_f - 1.0 \text{ eV}, E_f)$  and  $(E_f, E_f + 1.0 \text{ eV})$ . The blue, green, red and black spheres denote the octahedral Co, tetrahedral Co, O and P atoms, respectively. The charge density contours are in transparent yellow, and the isosurface values are set to be 0.1, 0.01, 0.09 and 0.04  $\text{electron}/\text{\AA}^3$  for (a), (b), (c) and (d), respectively.

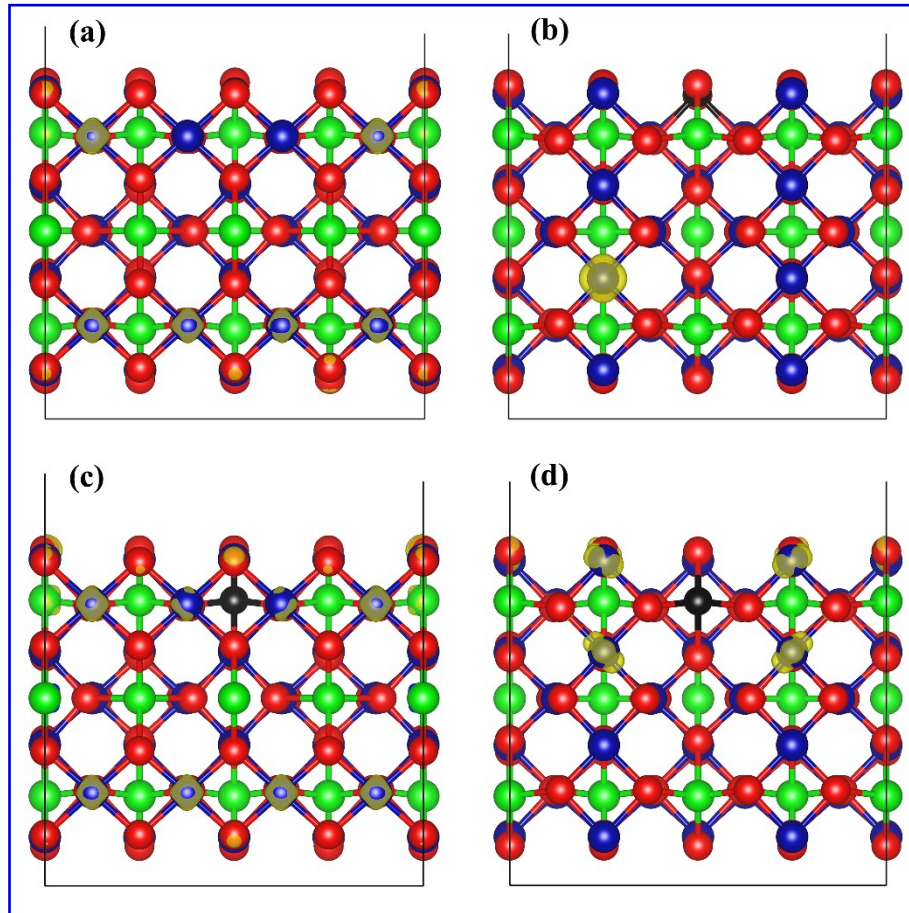

**Fig. S9.** (a) and (b) are the decomposed charge density of P doping at 110-B  $\text{Co}_{\text{oct}}$  in the energy range of  $(E_f - 1.0 \text{ eV}, E_f)$  and  $(E_f, E_f + 1.0 \text{ eV})$ . (c) and (d) are the decomposed charge density of P doping at 110-B  $\text{Co}_{\text{tet}}$  in the energy range of  $(E_f - 1.0 \text{ eV}, E_f)$  and  $(E_f, E_f + 1.0 \text{ eV})$ . The blue, green, red and black spheres denote the octahedral Co, tetrahedral Co, O and P atoms, respectively. The charge density contours are in transparent yellow, and the isosurface values are set to be 0.13, 0.05, 0.12 and 0.03  $\text{electron}/\text{\AA}^3$  for (a), (b), (c) and (d), respectively.
